# Supplementary material for: Discordant transmission of bacteria and viruses from mothers to babies at birth
Source: PubMed Central journal article supplement (PMC6902606; doi:10.1186/s40168-019-0766-7), 2019-12-10
Supplement: 40168_2019_766_MOESM2_ESM.pdf [file 40168_2019_766_MOESM2_ESM.pdf]

# Supplementary Figure 1

**A**

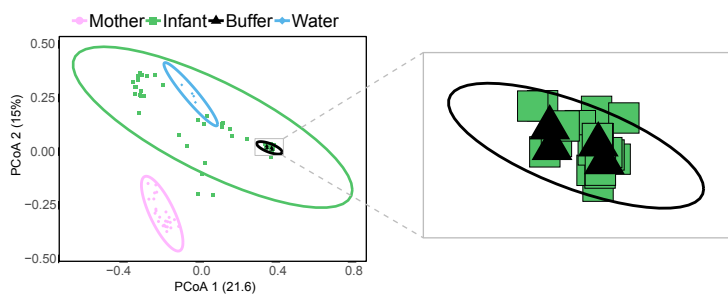

**B**

|                                       | Features         | MaAslin         |                    | Random Forest      |      |
|---------------------------------------|------------------|-----------------|--------------------|--------------------|------|
|                                       |                  | Average P.value | Average P.adjusted | OOB error rate (%) | AUC  |
| <b>Infant Microbiome</b>              | Zygoty           | 0               | ns                 | ns                 | ns   |
|                                       | Delivery Route   | 0               | ns                 | ns                 | ns   |
|                                       | Feeding Type     | 0               | ns                 | ns                 | ns   |
|                                       | Delivery Site    | 0               | ns                 | ns                 | ns   |
| <b>Mother &amp; Infant Microbiome</b> | Race             | 1               | 1.54E-06           | 6.93E-04           | 19.3 |
|                                       | Pre-preg BMI Cat | 0               | ns                 | ns                 | ns   |
|                                       | Mother or Infant | 60              | 3.79E-05           | 7.66E-03           | 7.02 |

**C**

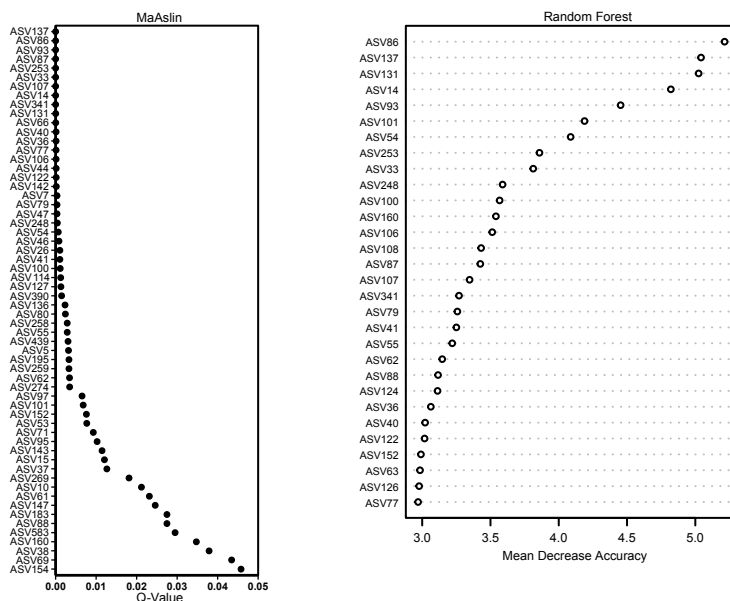

**D**

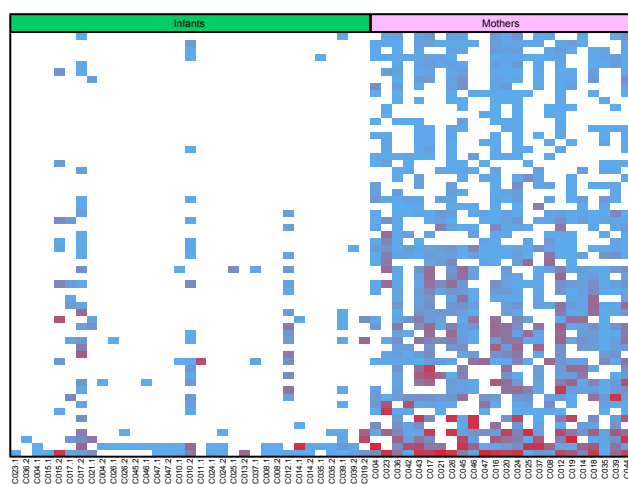

**E**

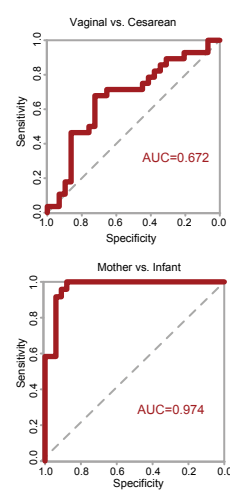

**F**

|                                       | Weighted Unifrac Distance    |               |
|---------------------------------------|------------------------------|---------------|
| <b>Infant Microbiome</b>              | Zygoty (related infants)     | ns            |
|                                       | Delivery Route (all infants) | 1.50E-05      |
|                                       | Feeding Type (all infants)   | ns; ns; 0.002 |
|                                       | Delivery Site                | 6.22E-06      |
| <b>Mother &amp; Infant Microbiome</b> | Race                         | ns            |
|                                       | Pre-preg BMI Cat             | ns            |
|                                       | Mother or Infant             | 2.10E-33      |

**G**

|                                          | Weighted Unifrac Distance |    |
|------------------------------------------|---------------------------|----|
| <b>Related Mother Infant Paired Data</b> | Zygoty                    | ns |
|                                          | Delivery Route            | ns |
|                                          | Feeding Type              | ns |
|                                          | Delivery Site             | ns |
|                                          | Race                      | ns |
|                                          | Pre-preg BMI Cat          | ns |
|                                          | Mother or Infant          | NA |
