# Supplementary material for: Discordant transmission of bacteria and viruses from mothers to babies at birth
Source: PubMed Central journal article supplement (PMC6902606; doi:10.1186/s40168-019-0766-7), 2019-12-10
Supplement: 40168_2019_766_MOESM4_ESM.pdf [file 40168_2019_766_MOESM4_ESM.pdf]

# Supplemental Figure 3

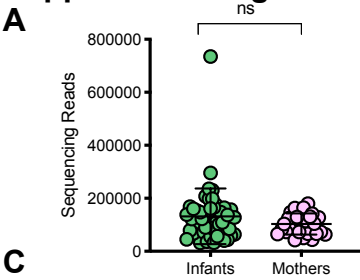

**B**

|                         | Features         | MaAsin          |                    | RandomForest       |       |      |
|-------------------------|------------------|-----------------|--------------------|--------------------|-------|------|
|                         |                  | Average P-value | Average P.adjusted | OOB error rate (%) | AUC   |      |
| Infant Vrome            | Zygotisty        | 0               | ns                 | ns                 | ns    |      |
|                         | Delivery Route   | 0               | ns                 | ns                 | ns    |      |
|                         | Feeding Type     | 0               | ns                 | ns                 | ns    |      |
| Mother and Infant Vrome | Delivery Site    | 0               | ns                 | ns                 | ns    |      |
|                         | Race             | 0               | ns                 | ns                 | ns    |      |
|                         | Pre-preg BMI Cat | 1               | 6.63E-04           | 4.65E-02           | 48.05 | 0.57 |
|                         | Mother or Infant | 47              | 2.54E-04           | 1.03E-02           | 2.6   | 0.99 |

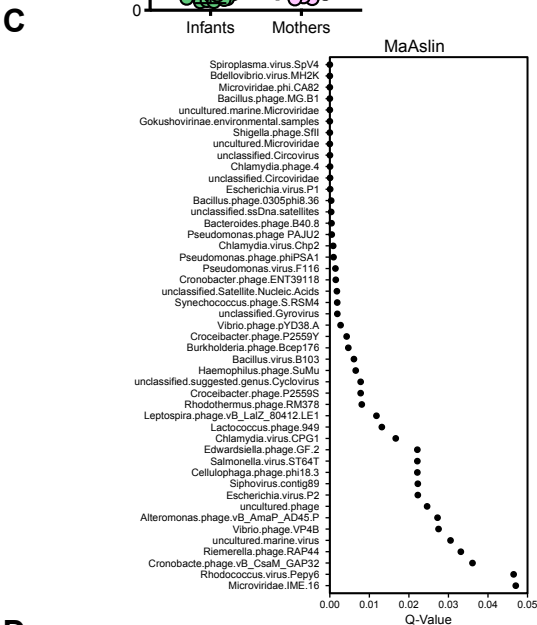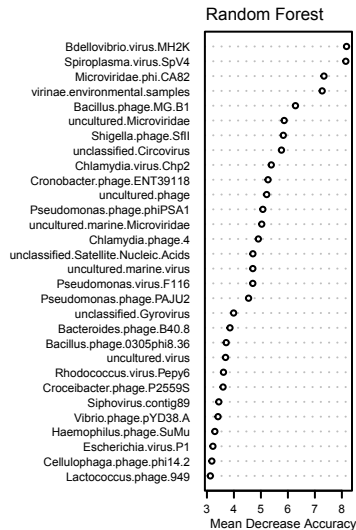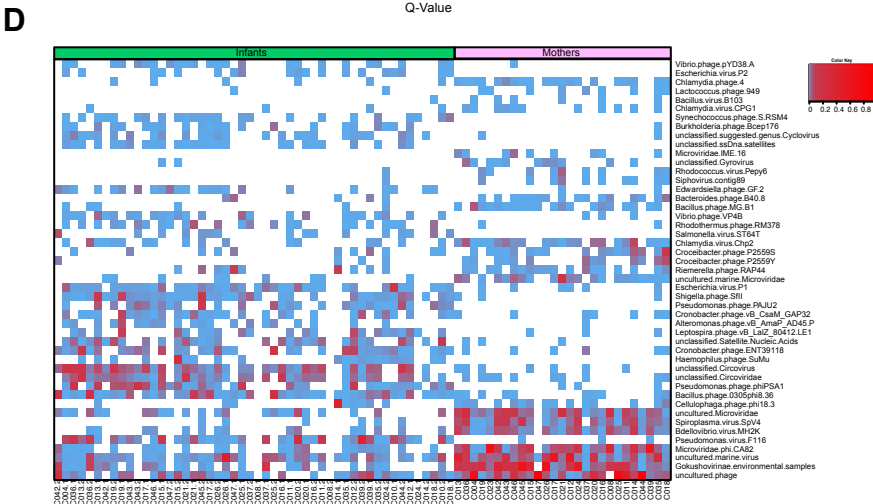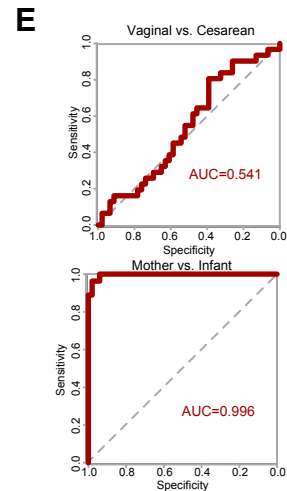

**F**

|                         | Bray-Curtis Dissimilarity    |                           |
|-------------------------|------------------------------|---------------------------|
| Infant Vrome            | Zygotisty (related infants)  | ns                        |
|                         | Delivery Route (all Infants) | ns                        |
|                         | Feeding Type (all Infants)   | <0.0001; ns; <0.0001      |
| Mother and Infant Vrome | Delivery Site                | ns                        |
|                         | Race                         | 0.025                     |
|                         | Pre-preg BMI Cat             | <0.0001; <0.0001; <0.0001 |
|                         | Mother or Infant             | <0.0001                   |

**G**

|                                   | Bray-Curtis Dissimilarity |                |
|-----------------------------------|---------------------------|----------------|
| Related Mother Infant Paired Data | Zygotisty                 | ns             |
|                                   | Delivery Route            | ns             |
|                                   | Feeding Type              | 0.0265; ns; ns |
|                                   | Delivery Site             | ns             |
|                                   | Race                      | ns             |
|                                   | Pre-preg BMI Cat          | 0.0349; ns; ns |
|                                   | Mother or Infant          | NA             |
