# Supplementary material for: Discordant transmission of bacteria and viruses from mothers to babies at birth
Source: PubMed Central journal article supplement (PMC6902606; doi:10.1186/s40168-019-0766-7), 2019-12-10

# Supplemental Figure 4

## A

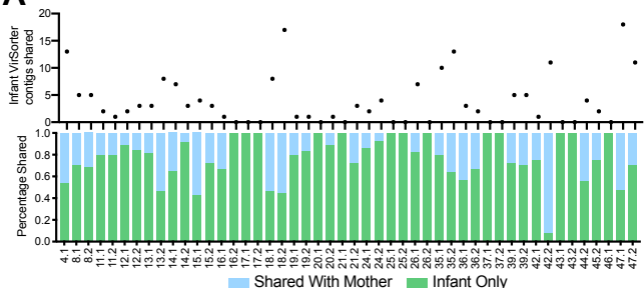

## B

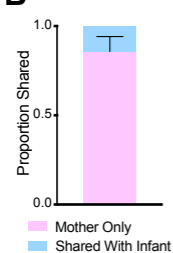

## C

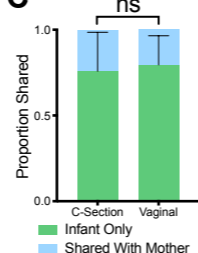

## D

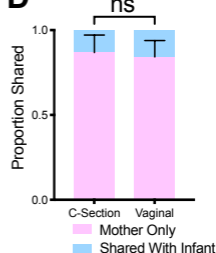

## E

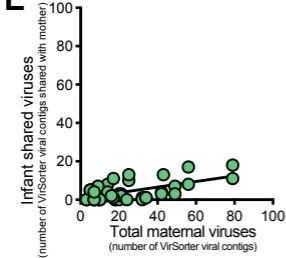

Supplement: 40168_2019_766_MOESM5_ESM.pdf [file 40168_2019_766_MOESM5_ESM.pdf]
