# Supplementary material for: Discordant transmission of bacteria and viruses from mothers to babies at birth
Source: Microbiome. 2019 Dec 10;7:156. doi: 10.1186/s40168-019-0766-7 (PMC6902606; doi:10.1186/s40168-019-0766-7)
Supplement: Supplementary file 7 — Additional file 6: Table S1. Cohort metadata and sample inclusion status. [file 40168_2019_766_MOESM7_ESM.xlsx]

## Sheet: Master_Spreadsheet_Stool_Sample
Subject_ID	Family_Group	InfantMother	DeliveryRoute	FeedingType	Zygosity	Collection from birth (days)	Collection from birth (Hours)	DeliverySite	Mother_Age	Pre-Preg BMI Cat	Race	Inclusion status for bacterial analysis	Inclusion status for viral analysis
C004	4	mother	NA	NA	NA	-6	-144	1	33	overweight	White	included	included
C004.1	4	infant	Cesarean	mix	Dizygotic	4	92.5167	1	33	overweight	White	included	included
C004.2	4	infant	Cesarean	mix	Dizygotic	4	74	1	33	overweight	White	included	excluded_insufficient_volume_after_filter
C008	8	mother	NA	NA	NA	5	120	1	37	normal	White	included	included
C008.1	8	infant	Vaginal	formula	Dizygotic	2	42.8	1	37	normal	White	included	included
C008.2	8	infant	Vaginal	formula	Dizygotic	2	38.2	1	37	normal	White	included	included
C010	10	mother	NA	NA	NA	6	144	1	30	normal	White	excluded_did_not_amplify	excluded_did_not_amplify
C010.1	10	infant	Cesarean	mix	Dizygotic	4	77.9333	1	30	normal	White	included, but excluded from paired mother_infant_analyses	included, but excluded from paired mother_infant_analyses
C010.2	10	infant	Cesarean	mix	Dizygotic	4	63.6667	1	30	normal	White	included, but excluded from paired mother_infant_analyses	included, but excluded from paired mother_infant_analyses
C011	11	mother	NA	NA	NA	-15	-360	1	31	overweight	White	excluded_low_read_count	included
C011.1	11	infant	Vaginal	mix	Dizygotic	0	3.3	1	31	overweight	White	included, but excluded from paired mother_infant_analyses	included
C011.2	11	infant	Vaginal	mix	Dizygotic	1	26.9167	1	31	overweight	White	excluded_in_buffer_ellipse	included
C012	12	mother	NA	NA	NA	-5	-120	1	31	normal	White	included	included
C012.1	12	infant	Vaginal	mix	Monozygotic	1	11.5	1	31	normal	White	included	included
C012.2	12	infant	Vaginal	mix	Monozygotic	1	11.9	1	31	normal	White	excluded_in_buffer_ellipse	included
C013	13	mother	NA	NA	NA	55	1320	1	34	normal	White	excluded_did_not_amplify	included
C013.1	13	infant	Cesarean	mix	Monozygotic	1	3.65	1	34	normal	White	excluded_in_buffer_ellipse	included
C013.2	13	infant	Cesarean	mix	Monozygotic	1	4.46667	1	34	normal	White	included, but excluded from paired mother_infant_analyses	included
C014	14	mother	NA	NA	NA	7	168	1	29	normal	White	included	included
C014.1	14	infant	Vaginal	mix	Dizygotic	2	52.6167	1	29	normal	White	included	included
C014.2	14	infant	Vaginal	mix	Dizygotic	3	65.2667	1	29	normal	White	included	included
C015	15	mother	NA	NA	NA	5	120	2	28	normal	White	excluded_did_not_amplify	included
C015.1	15	infant	Vaginal	breast_milk	Monozygotic	2	42.9167	2	28	normal	White	included, but excluded from paired mother_infant_analyses	included
C015.2	15	infant	Vaginal	breast_milk	Monozygotic	2	40.8333	2	28	normal	White	included, but excluded from paired mother_infant_analyses	included
C016	16	mother	NA	NA	NA	-4	-96	2	45	normal	White	included, but excluded from paired mother_infant_analyses	included
C016.1	16	infant	Cesarean	formula	Dizygotic	1	14.45	2	45	normal	White	excluded_in_buffer_ellipse	included
C016.2	16	infant	Cesarean	formula	Dizygotic	2	34.1667	2	45	normal	White	excluded_in_buffer_ellipse	included
C017	17	mother	NA	NA	NA	9	216	2	40	obese	White	included	included
C017.1	17	infant	Vaginal	mix	Dizygotic	2	47.2	2	40	obese	White	included	included
C017.2	17	infant	Vaginal	mix	Dizygotic	3	58.7	2	40	obese	White	included	included
C018	18	mother	NA	NA	NA	51	1224	2	32	overweight	AfricanAmerican	included, but excluded from paired mother_infant_analyses	included
C018.1	18	infant	Cesarean	formula	Dizygotic	3	63.9	2	32	overweight	AfricanAmerican	excluded_low_read_count	included
C018.2	18	infant	Cesarean	formula	Dizygotic	3	67.2667	2	32	overweight	AfricanAmerican	excluded_low_read_count	included
C019	19	mother	NA	NA	NA	-11	-264	1	36	normal	White	included	included
C019.1	19	infant	Cesarean	mix	Monozygotic	1	17.2667	1	36	normal	White	excluded_in_buffer_ellipse	included
C019.2	19	infant	Cesarean	mix	Monozygotic	1	15.4167	1	36	normal	White	included	included
C020	20	mother	NA	NA	NA	0	0	1	35	obese	White	included, but excluded from paired mother_infant_analyses	included
C020.1	20	infant	Cesarean	breast_milk	Monozygotic	1	8.71667	1	35	obese	White	excluded_in_buffer_ellipse	included
C020.2	20	infant	Cesarean	breast_milk	Monozygotic	1	8.68333	1	35	obese	White	excluded_in_buffer_ellipse	included
C021	21	mother	NA	NA	NA	20	480	1	27	obese	White	included	included
C021.1	21	infant	Vaginal	mix	Monozygotic	1	3.91667	1	27	obese	White	included	included
C021.2	21	infant	Vaginal	mix	Monozygotic	1	5.66667	1	27	obese	White	excluded_in_buffer_ellipse	included
C023	23	mother	NA	NA	NA	2	48	1	30	normal	White	included	included, but excluded from paired mother_infant_analyses
C023.1	23	infant	Vaginal	formula	Dizygotic	2	45.3833	1	30	normal	White	included	excluded_did_not_amplify
C023.2	23	infant	Cesarean	formula	Dizygotic	3	69.1833	1	30	normal	White	excluded_did_not_amplify	excluded_did_not_amplify
C024	24	mother	NA	NA	NA	15	360	1	28	overweight	White	included	included
C024.1	24	infant	Cesarean	mix	Dizygotic	3	74.5667	1	28	overweight	White	included	included
C024.2	24	infant	Cesarean	mix	Dizygotic	3	75.4667	1	28	overweight	White	included	included
C025	25	mother	NA	NA	NA	70	1680	2	36	normal	White	included	included
C025.1	25	infant	Vaginal	mix	Monozygotic	2	25.35	2	36	normal	White	included	included
C025.2	25	infant	Cesarean	mix	Monozygotic	2	17.9167	2	36	normal	White	excluded_in_buffer_ellipse	included
C026	26	mother	NA	NA	NA	14	336	1	32	normal	White	included	included
C026.1	26	infant	Vaginal	mix	Dizygotic	2	31.75	1	32	normal	White	included	included
C026.2	26	infant	Vaginal	mix	Dizygotic	2	27.9333	1	32	normal	White	included	included
C035	35	mother	NA	NA	NA	3	72	1	26	obese	White	included	included
C035.1	35	infant	Vaginal	breast_milk	Monozygotic	1	17.7667	1	26	obese	White	included	included
C035.2	35	infant	Vaginal	breast_milk	Monozygotic	1	18.1833	1	26	obese	White	included	included
C036	36	mother	NA	NA	NA	3	72	2	27	normal	White	included	included
C036.1	36	infant	Cesarean	breast_milk	Monozygotic	1	8.23333	2	27	normal	White	excluded_in_buffer_ellipse	included
C036.2	36	infant	Cesarean	mix	Monozygotic	3	75.2	2	27	normal	White	included	included
C037	37	mother	NA	NA	NA	3	72	2	29	normal	White	included	included
C037.1	37	infant	Cesarean	breast_milk	Monozygotic	2	26.1667	2	29	normal	White	included	included
C037.2	37	infant	Cesarean	mix	Monozygotic	1	4.65	2	29	normal	White	excluded_in_buffer_ellipse	included
C039	39	mother	NA	NA	NA	4	96	2	29	normal	AfricanAmerican	included	included
C039.1	39	infant	Cesarean	mix	Monozygotic	3	42.2	2	29	normal	AfricanAmerican	included	included
C039.2	39	infant	Cesarean	mix	Monozygotic	3	41.1833	2	29	normal	AfricanAmerican	included	included
C042	42	mother	NA	NA	NA	2	48	1	28	overweight	White	included, but excluded from paired mother_infant_analyses	included
C042.1	42	infant	Cesarean	formula	Monozygotic	1	11.3667	1	28	overweight	White	excluded_in_buffer_ellipse	included
C042.2	42	infant	Cesarean	formula	Monozygotic	1	17.0833	1	28	overweight	White	excluded_in_buffer_ellipse	included
C043	43	mother	NA	NA	NA	34	816	1	26	overweight	White	included, but excluded from paired mother_infant_analyses	included
C043.1	43	infant	Cesarean	formula	Monozygotic	2	35.35	1	26	overweight	White	excluded_in_buffer_ellipse	included
C043.2	43	infant	Cesarean	formula	Monozygotic	2	32.3167	1	26	overweight	White	excluded_in_buffer_ellipse	included
C044	44	mother	NA	NA	NA	38	912	1	38	obese	White	included, but excluded from paired mother_infant_analyses	included
C044.1	44	infant	Cesarean	mix	Monozygotic	3	50.9333	1	38	obese	White	excluded_in_buffer_ellipse	excluded_low_read_count
C044.2	44	infant	Cesarean	mix	Monozygotic	2	36.1667	1	38	obese	White	excluded_in_buffer_ellipse	included
C045	45	mother	NA	NA	NA	28	672	2	31	obese	AfricanAmerican	included	included
C045.1	45	infant	Cesarean	formula	Dizygotic	2	47.1167	2	31	obese	AfricanAmerican	excluded_did_not_amplify	excluded_did_not_amplify
C045.2	45	infant	Cesarean	formula	Dizygotic	2	38.2167	2	31	obese	AfricanAmerican	included	included
C046	46	mother	NA	NA	NA	4	96	2	26	overweight	AfricanAmerican	included	included
C046.1	46	infant	Cesarean	mix	Dizygotic	4	75.6333	2	26	overweight	AfricanAmerican	included	included
C046.2	46	infant	Cesarean	mix	Dizygotic	4	77.1167	2	26	overweight	AfricanAmerican	excluded_low_read_count	excluded_did_not_amplify
C047	47	mother	NA	NA	NA	-7	-168	2	24	overweight	AfricanAmerican	included	included
C047.1	47	infant	Vaginal	formula	Monozygotic	3	41.4333	2	24	overweight	AfricanAmerican	included	included
C047.2	47	infant	Cesarean	formula	Monozygotic	3	52.9333	2	24	overweight	AfricanAmerican	included	included
